# Supplementary material for: Assessment of Immunogenicity and Efficacy of CV0501 mRNA-Based Omicron COVID-19 Vaccination in Small Animal Models
Source: MDPI journal article supplement (doi:10.3390/vaccines11020318), 2023-01-31
Supplement: s1 [file s1]

## **Supplementary Data**

## Supplementary Figure S1: CV0501 vaccine induced strong cross-nAbs at Day 42 post-immunization

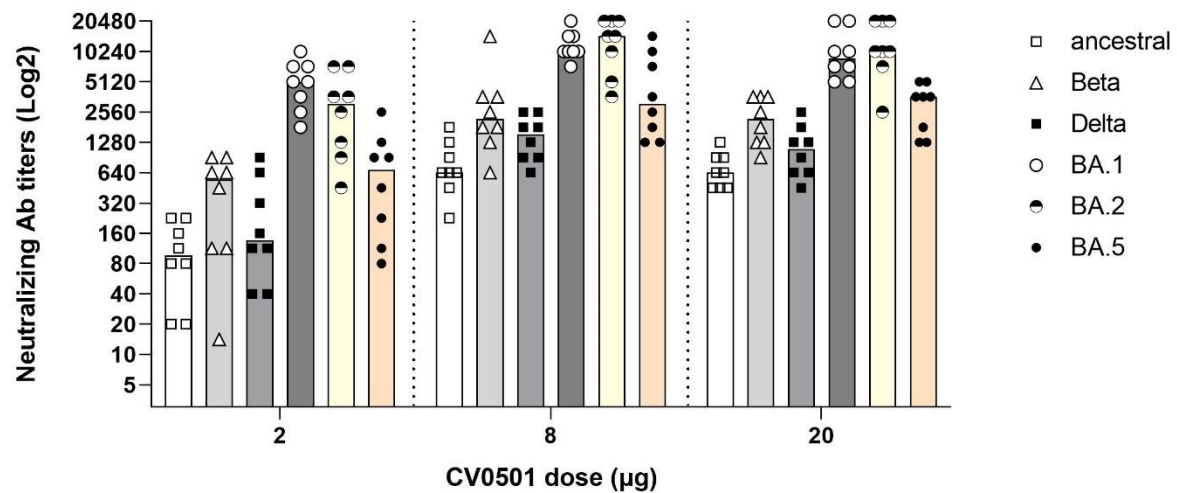

**Figure S1: CV0501 vaccine induced strong cross-nAbs at Day 42 post-immunization**

(Data from Figures 1 and 2 displayed).

Wistar rats (n=8/group) were immunized i.m. on Days 0 and 21 with 2, 8 or 20 µg CV0501. nAbs against ancestral, Beta, Delta, BA.2 and BA.5 SARS-CoV-2 were assessed from serum isolated on Day 42 post-immunization. Each symbol represents an individual animal and bars depict the median value.

## Supplementary Figure S2: CV0501 induces dose dependent IFN- $\gamma$ secreting T cells

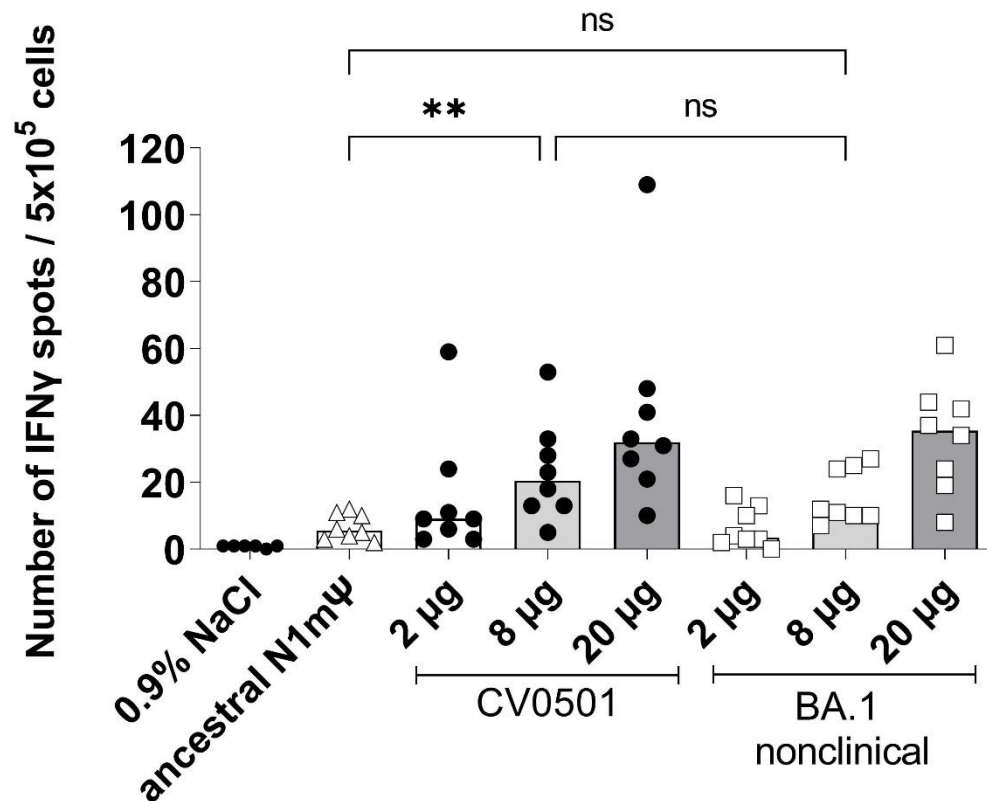

**Figure S2: Immunization with CV0501 induced significantly higher IFN- $\gamma$  secreting T cells compared with ancestral N1m $\psi$ .**

Splenocytes from rats immunized on Days 0 and 21 with either CV0501 (2, 8 or 20  $\mu$ g), BA.1 nonclinical (2, 8 or 20  $\mu$ g), ancestral N1m $\psi$  (8  $\mu$ g), or 0.9% NaCl buffer (sham control) were isolated on Day 42 and single-cell suspensions were prepared and stimulated for 24 hours at 37°C using a SARS-CoV-2 Omicron peptide library (JPT, PM-SARS2-SMUT08-1) at 1  $\mu$ g/mL. Each dot represents an individual animal and bars depict the mean. Statistical analysis was performed using ANOVA and Dunn's multiple comparison test (\*\*;  $p=0.0049$ ).

## Supplementary Figure S3: CV0501 booster immunization induces high cross-neutralizing antibodies against BA.1 in Wistar rats

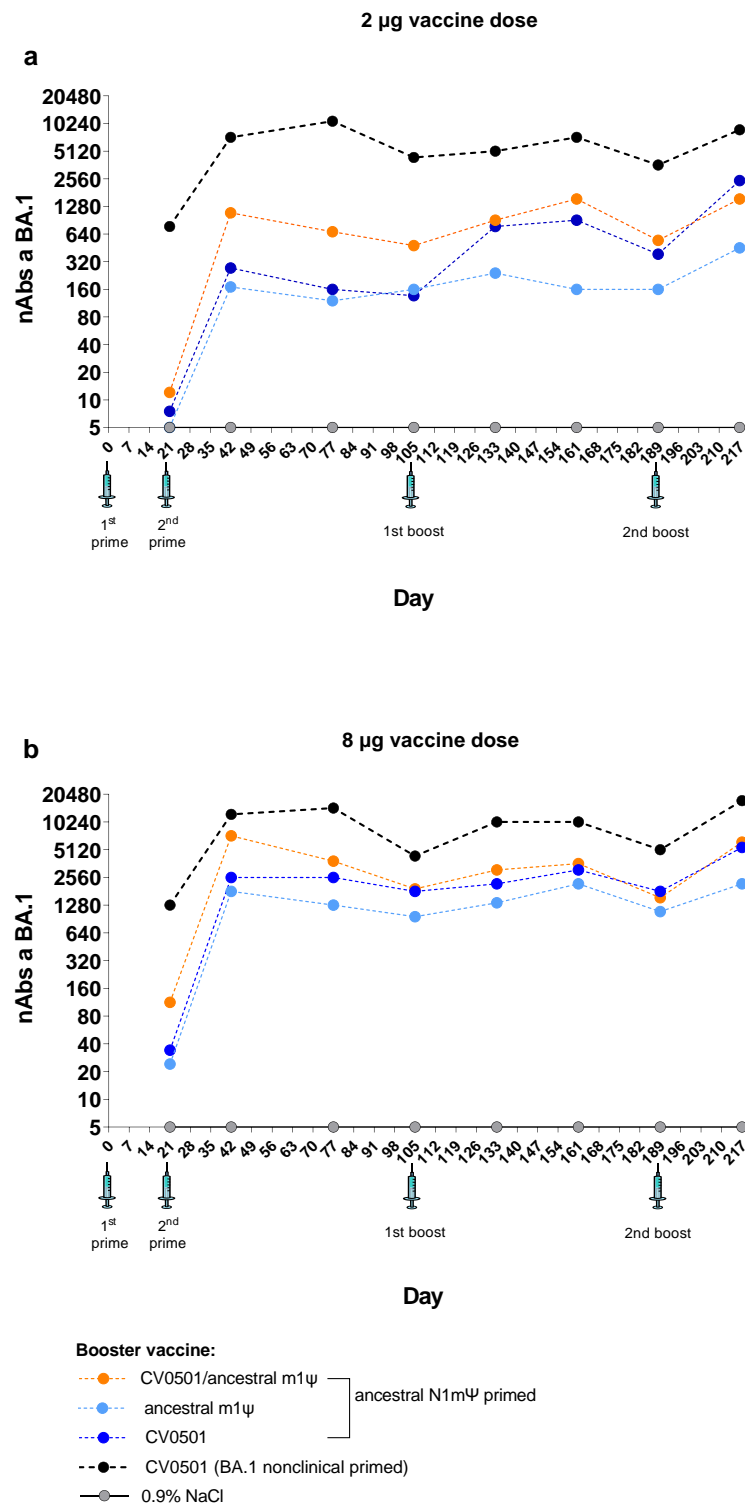

**Figure S3: CV0501 booster immunization induces high cross-neutralizing antibodies against BA.1 in Wistar rats**

Wister rats (n=8/group) were immunized on Days 0 and 21 with either 2 µg (**a**) or 8 µg (**b**) ancestral N1mΨ or BA.1 nonclinical. On Days 105 and 189, rats were given third and fourth (booster) doses of either CV0501 alone, ancestral N1mΨ alone, or bivalent CV0501/ancestral N1mΨ (half doses of each) at 2 µg or 8 µg doses. 0.9% NaCl was used as a sham control and was administered at the same timepoints. nAbs against BA.1 SARS-CoV-2 were assessed in serum obtained on Days 21, 42, 77, 105, 133, 161, 189 and 217 and analyzed at each timepoint. Each symbol represents the median value.

**Supplementary Figure S4: Induction of nAb against BA.1 Omicron variants observed after CV0501 immunization.**

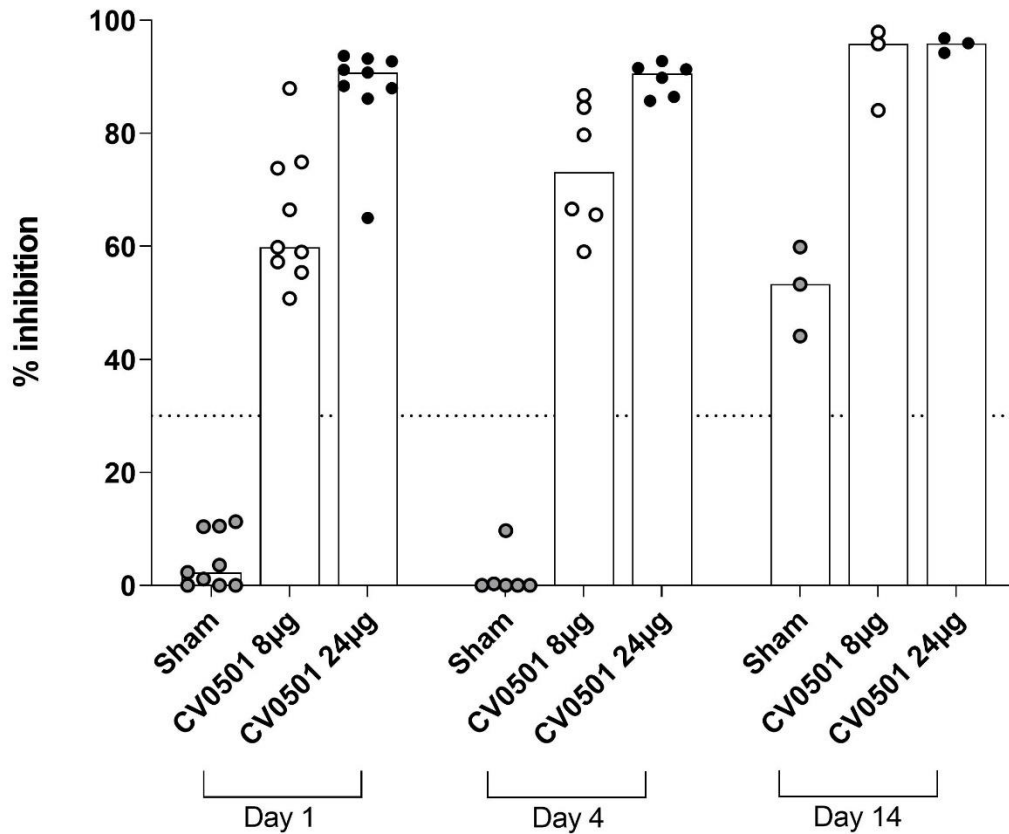

**Figure S4: Percentage of inhibition against BA.1 Omicron variants observed after CV0501 immunization.**

Hamsters (n=9/group) were immunized on Days 0 and 28 with 8 µg or 24 µg doses of CV0501 or 0.9% NaCl (sham controls) and challenged on Day 56 with Omicron BA.2 ( $10^5$  TCID<sub>50</sub>/animal administered i.n. at 0.05 mL per nostril). A surrogate ELISA was performed using serum samples to assess the percentage of inhibition against BA.1 on Days 0 and 4 (6 animals/groups) or Day 14 (3 animals/groups) post-challenge. Each dot represents an individual animal, bars depict the median value of the group at the various time points. Horizontal line represents the threshold of 30% inhibition, above which animals are classified as sero-positive against BA.1.

**Supplementary Table S1: Experimental design for booster response of monovalent and bivalent CV0501**

| Group | Animals                                     | 1st prime (Day 1)<br>2nd prime (Day 21) | 1st boost<br>(Day 105)                            | 2nd boost<br>(Day 189)                            | Blood<br>collection<br>schedule                          |
|-------|---------------------------------------------|-----------------------------------------|---------------------------------------------------|---------------------------------------------------|----------------------------------------------------------|
| 1     | <b>Female<br/>Wistar<br/>rats<br/>(N=6)</b> | 0.9% NaCl                               | 0.9% NaCl                                         | 0.9% NaCl                                         | Days 21,<br>42, 77,<br>105, 133,<br>161, 189,<br>and 217 |
| 2     | <b>Female<br/>Wistar<br/>rats<br/>(N=8)</b> | ancestral N1mΨ<br>2 µg                  | ancestral N1mΨ<br>2 µg                            | ancestral N1mΨ<br>2 µg                            |                                                          |
| 3     |                                             | ancestral N1mΨ<br>8 µg                  | ancestral N1mΨ<br>8 µg                            | ancestral N1mΨ<br>8 µg                            |                                                          |
| 4     |                                             | ancestral N1mΨ<br>2 µg                  | CV0501<br>2 µg                                    | CV0501<br>2 µg                                    |                                                          |
| 5     |                                             | ancestral N1mΨ<br>8 µg                  | CV0501<br>8 µg                                    | CV0501<br>8 µg                                    |                                                          |
| 6     |                                             | ancestral N1mΨ<br>2 µg                  | Bivalent<br>CV0501/ancestral<br>N1mΨ 2 µg (total) | Bivalent<br>CV0501/ancestral<br>N1mΨ 2 µg (total) |                                                          |
| 7     |                                             | ancestral N1mΨ<br>8 µg                  | Bivalent<br>CV0501/ancestral<br>N1mΨ 8 µg (total) | Bivalent<br>CV0501/ancestral<br>N1mΨ 8 µg (total) |                                                          |
| 8     |                                             | BA.1 nonclinical<br>N1mΨ<br>2 µg        | CV0501<br>2 µg                                    | CV0501<br>2 µg                                    |                                                          |
| 9     |                                             | BA.1 nonclinical<br>N1mΨ<br>8 µg        | CV0501<br>8 µg                                    | CV0501<br>8 µg                                    |                                                          |

N1mΨ, N1-methylpseudouridine.

**Supplementary Table S2: Antigens included in ACE2 inhibition assay**

| <b>SARS-CoV-2 variant</b>      | <b>Manufacturer</b> | <b>Cat. #</b> | <b>Lot #</b> |
|--------------------------------|---------------------|---------------|--------------|
| Wild type (B1 isolate)         | NMI                 | —             | —            |
| Alpha                          | NMI                 | —             | —            |
| Beta                           | NMI                 | —             | —            |
| Gamma                          | NMI                 | —             | —            |
| Delta                          | NMI                 | —             | —            |
| Omicron BA1 (15 RBD mutations) | Sino Biological     | 40592-V08H121 | LC16FE2107   |
| Omicron BA1 (12 RBD mutations) | Sino Biological     | 40592-V08H122 | LC16MA2204   |
| Omicron BA2                    | Sino Biological     | 40592-V08H123 | MA16MA1803   |
| Omicron BA2.12.1               | Sino Biological     | 40592-V08H132 | MB16MY1181   |
| Omicron BA4                    | Sino Biological     | 40592-V08H130 | LC16JU1717   |
| Omicron BA5                    | Sino Biological     | 40592-V08H131 | MA16JL0542   |

RBD, receptor binding domain; SARS-CoV-2, severe acute respiratory syndrome coronavirus-2.
